# Supplementary material
Source: PubMed Central journal article supplement (PMC8547118)

1B

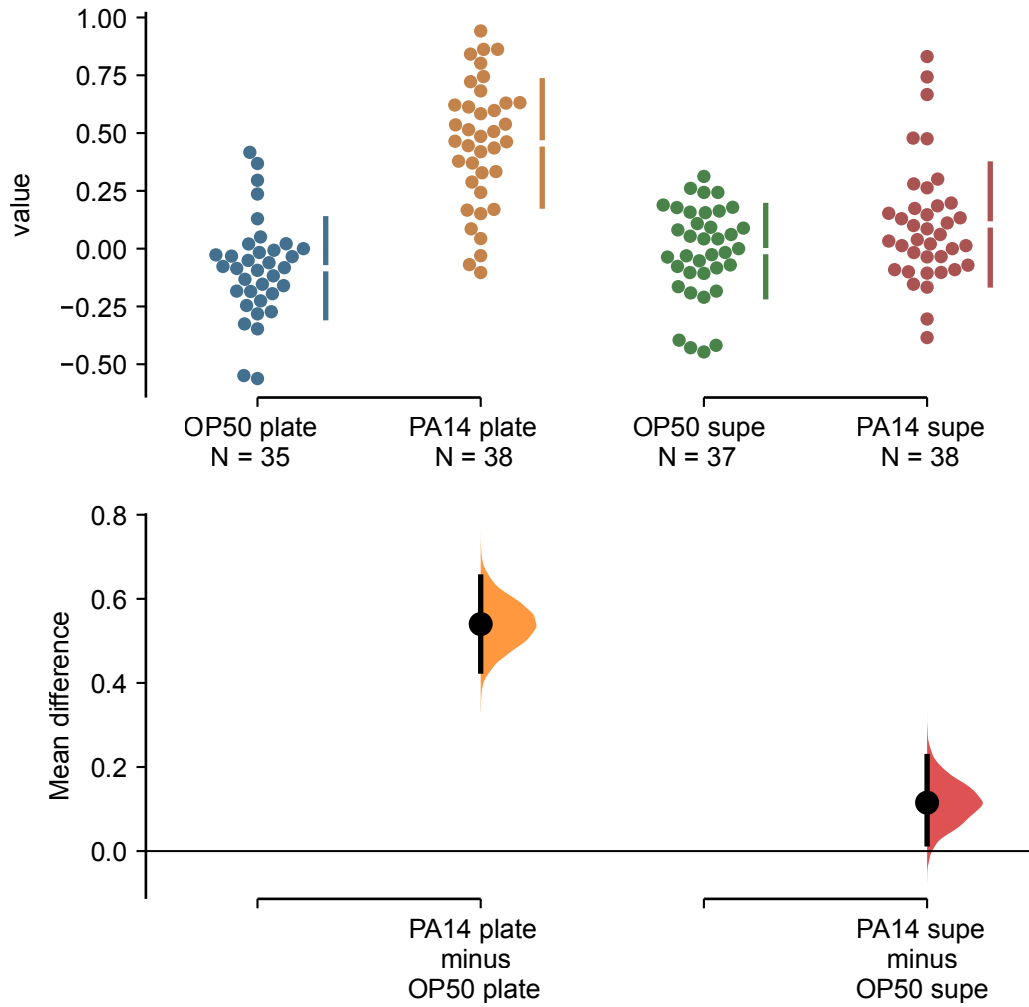

1C

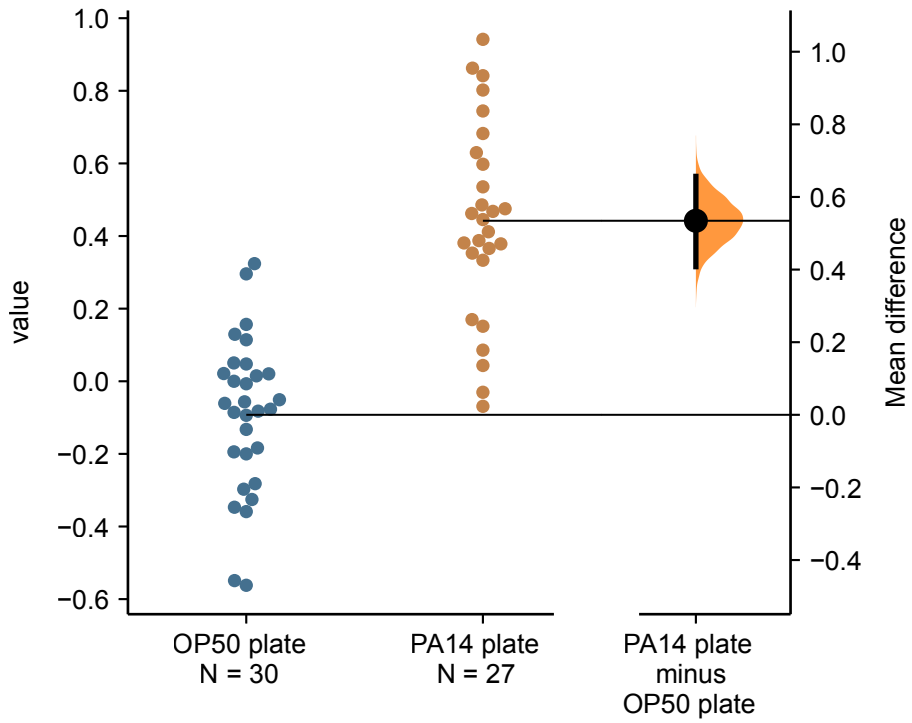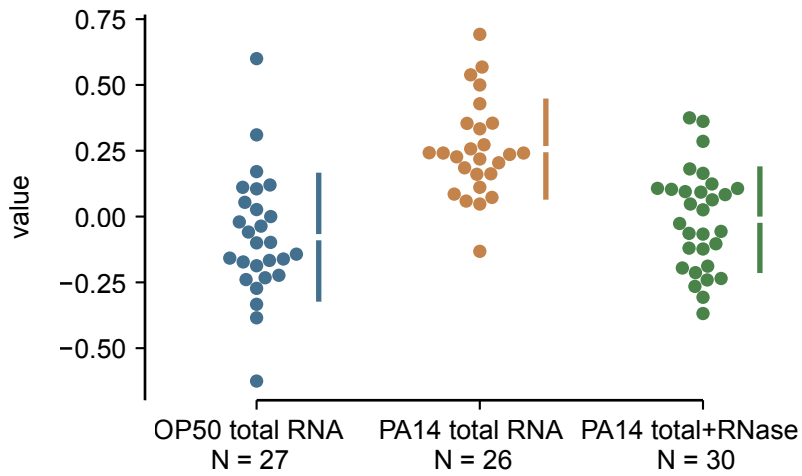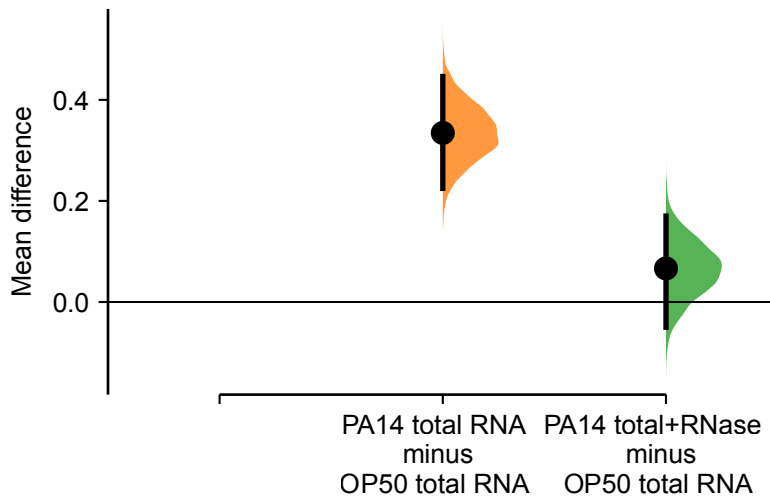

1D

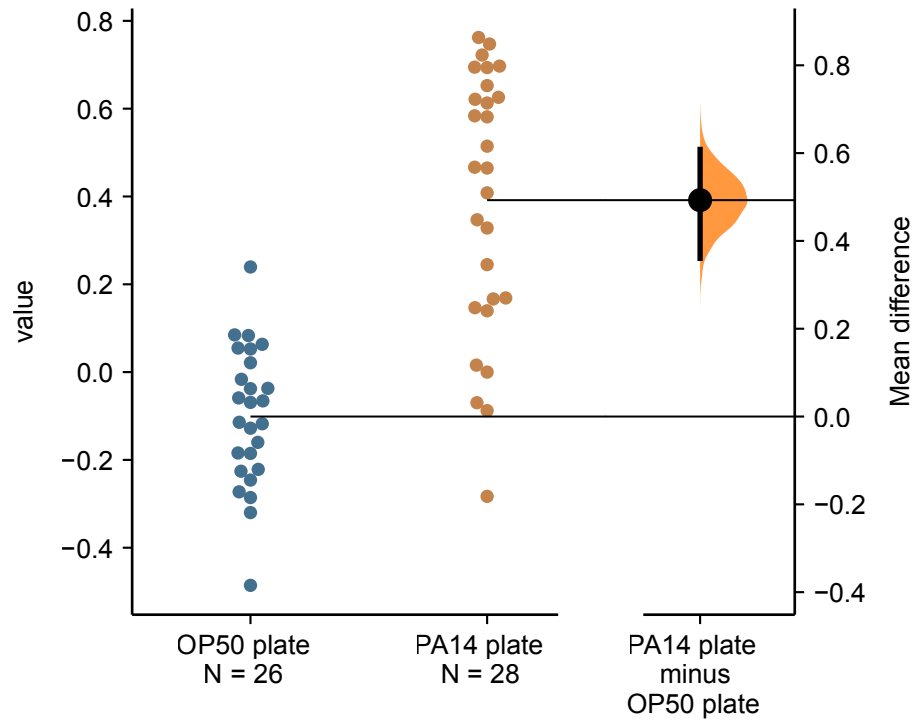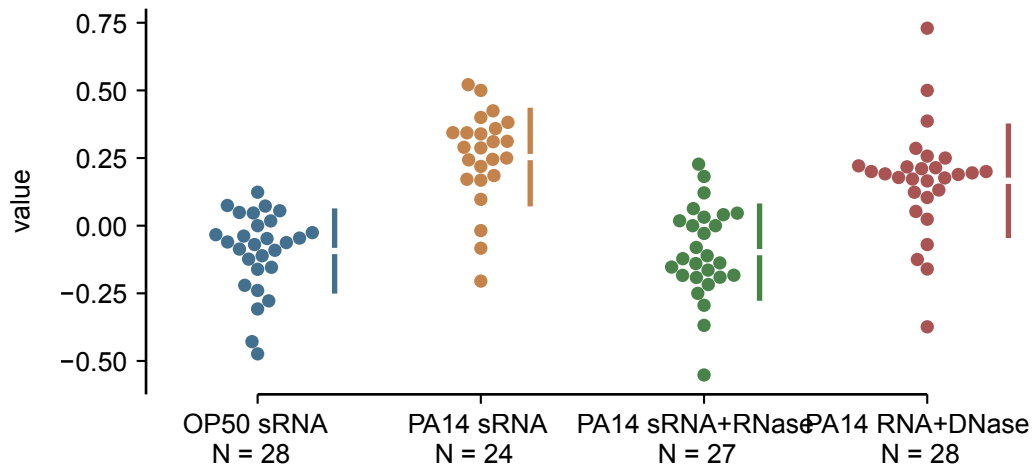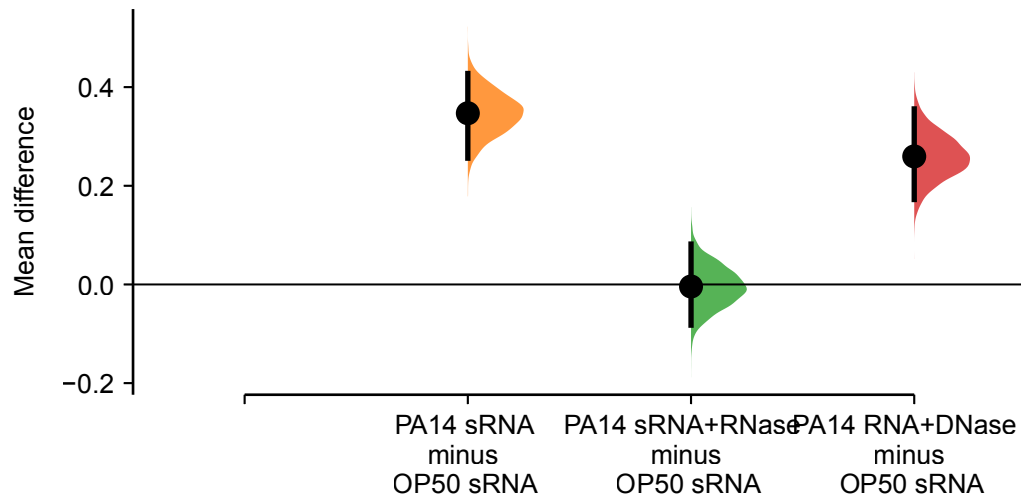

1E

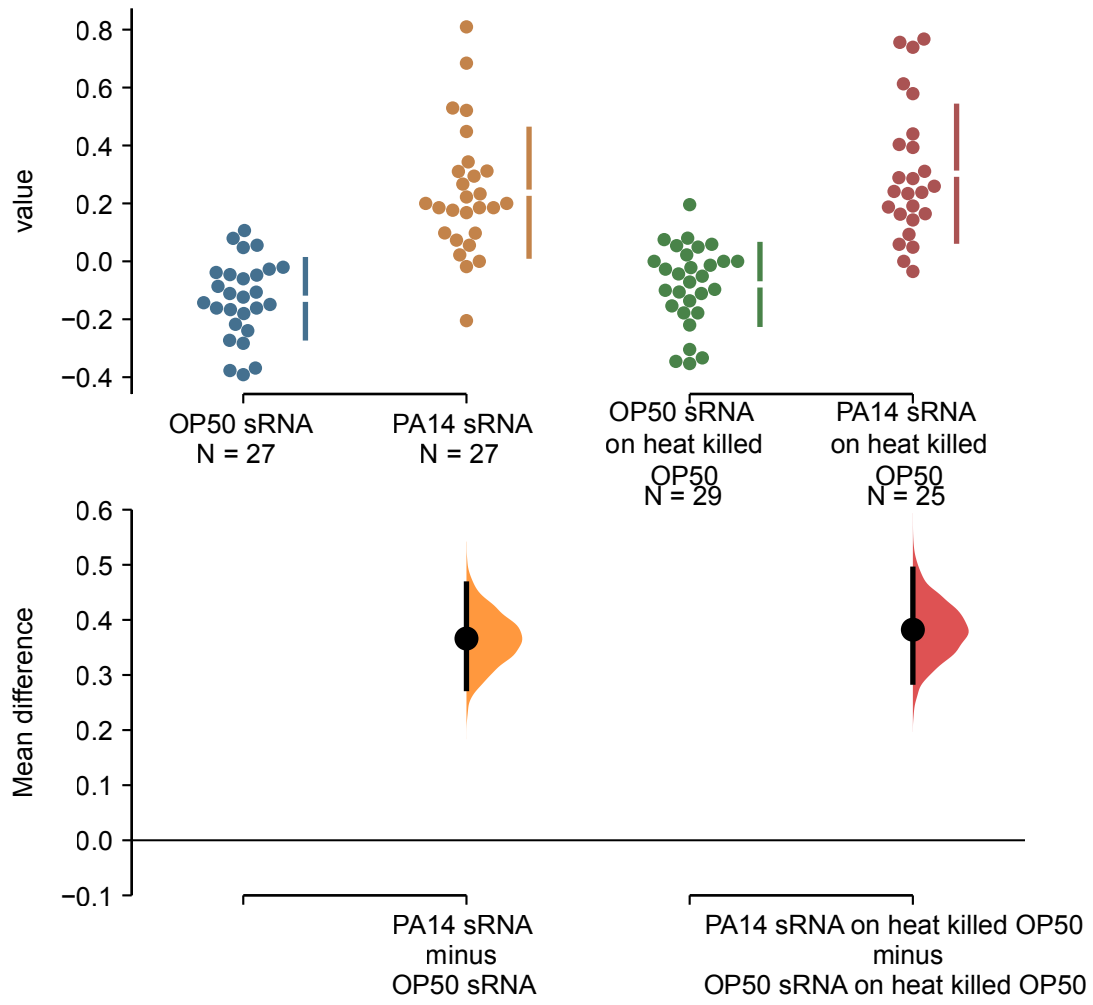

1F

OP50 vs Sm choice assay

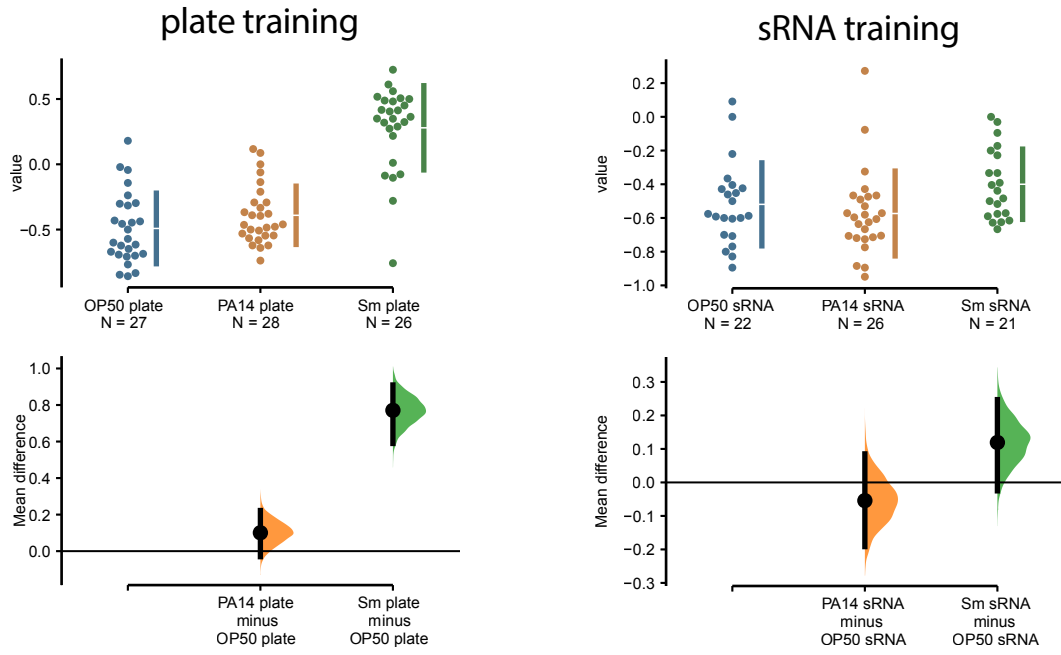

1G

OP50 vs PA14 choice assay

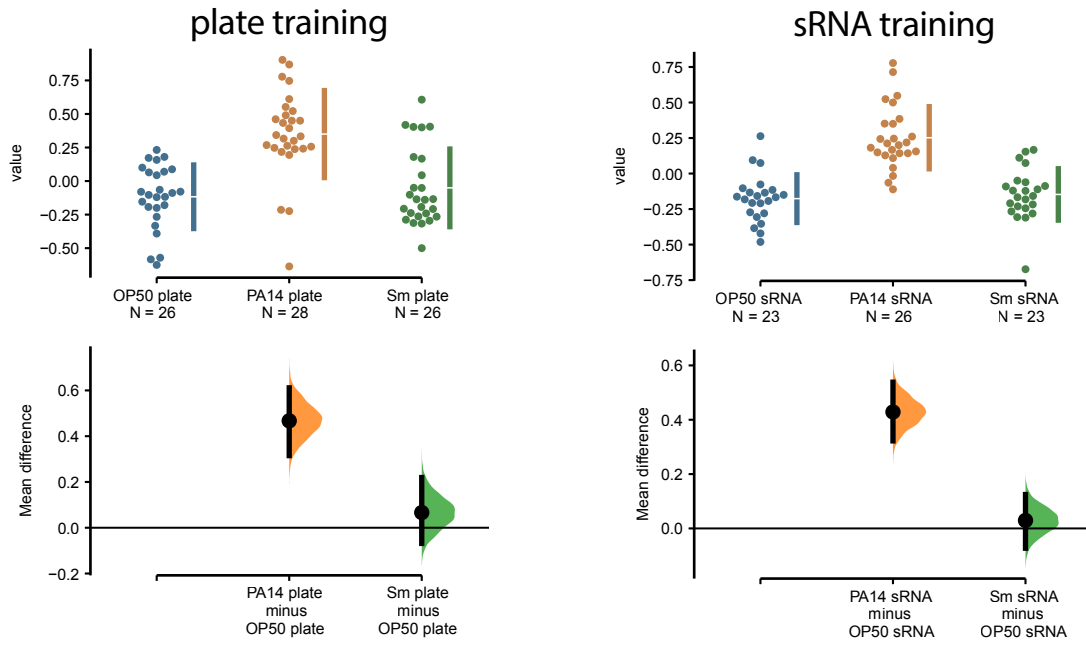

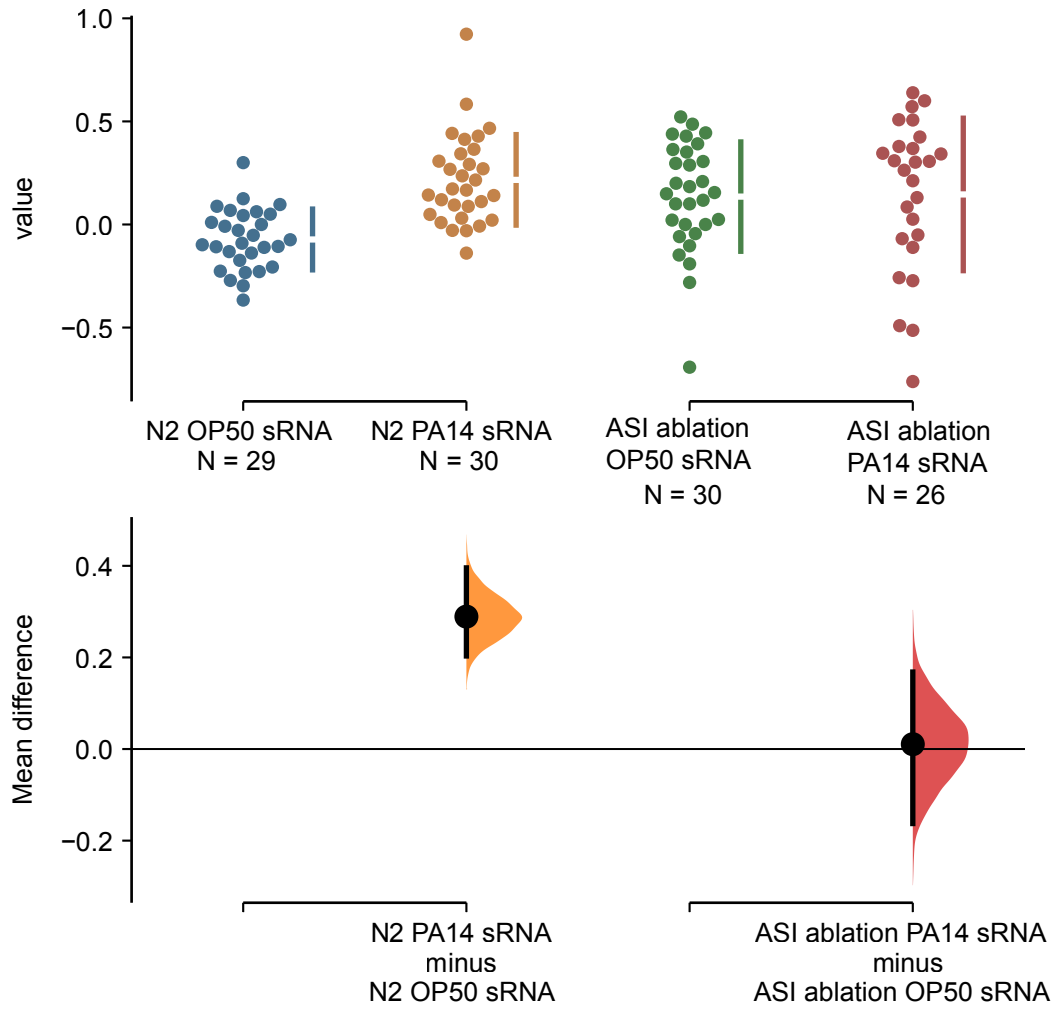

2B

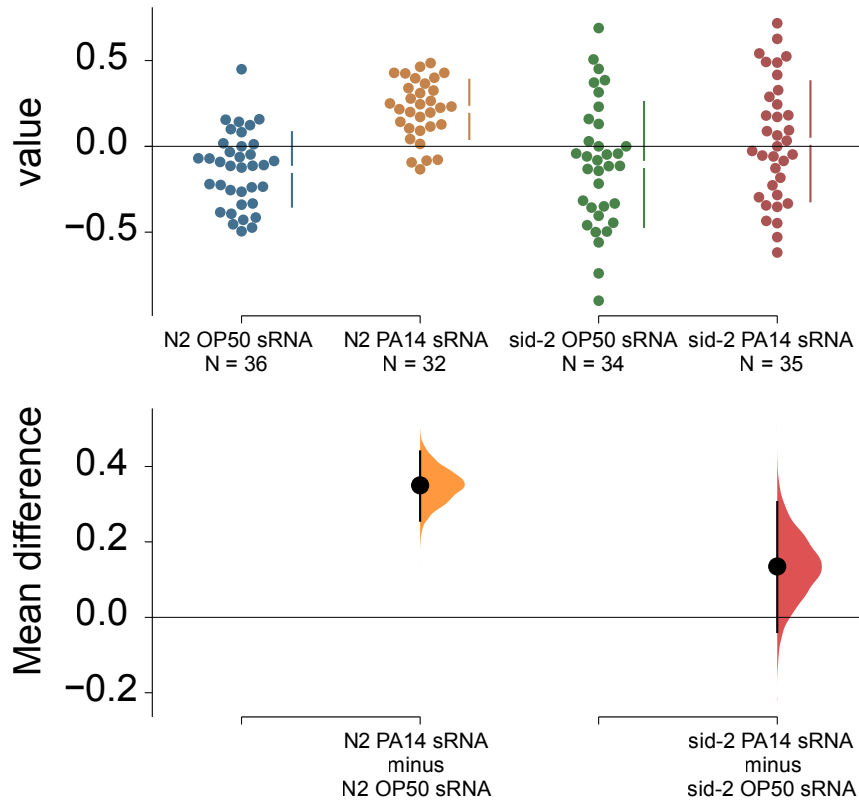



2C

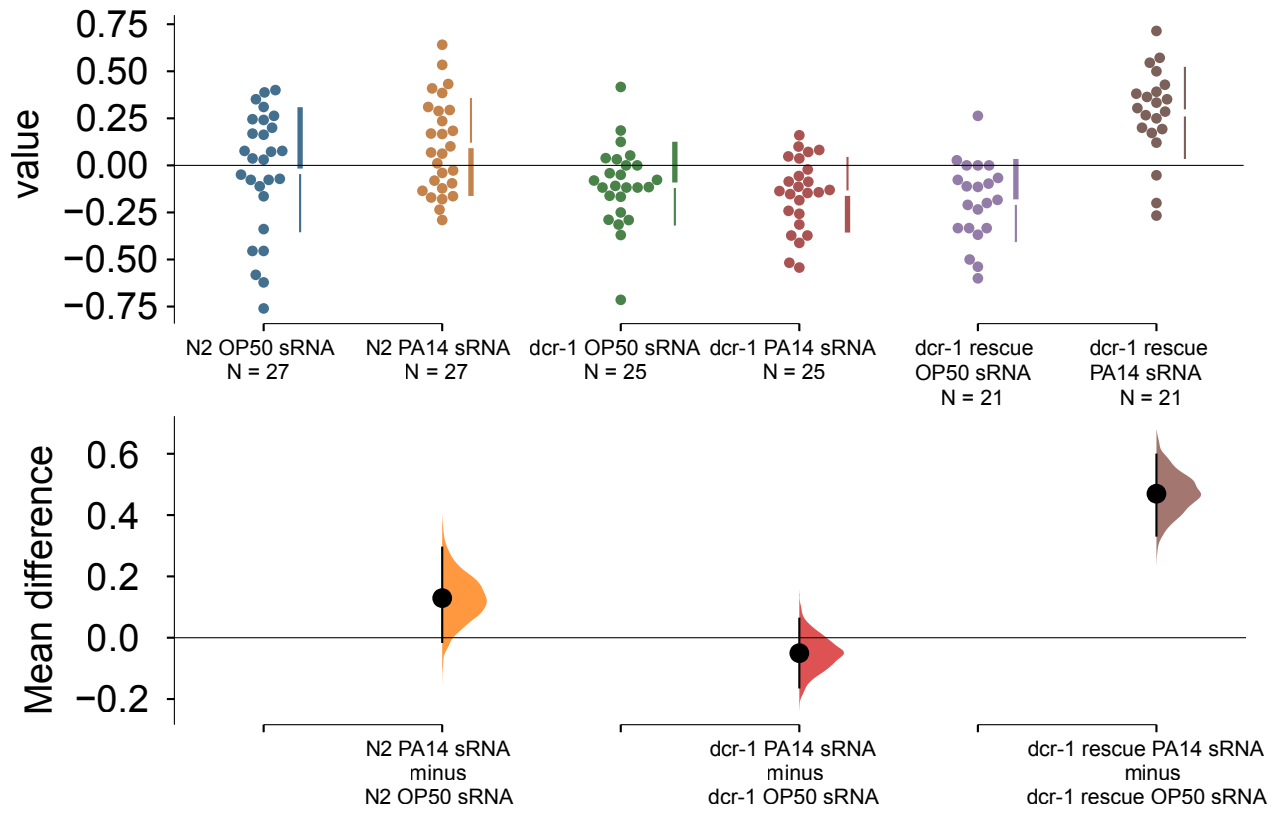

2D

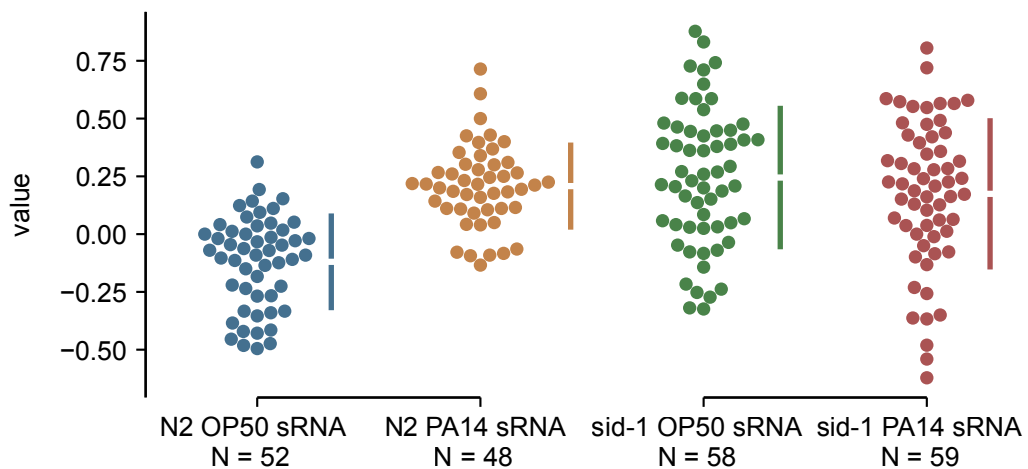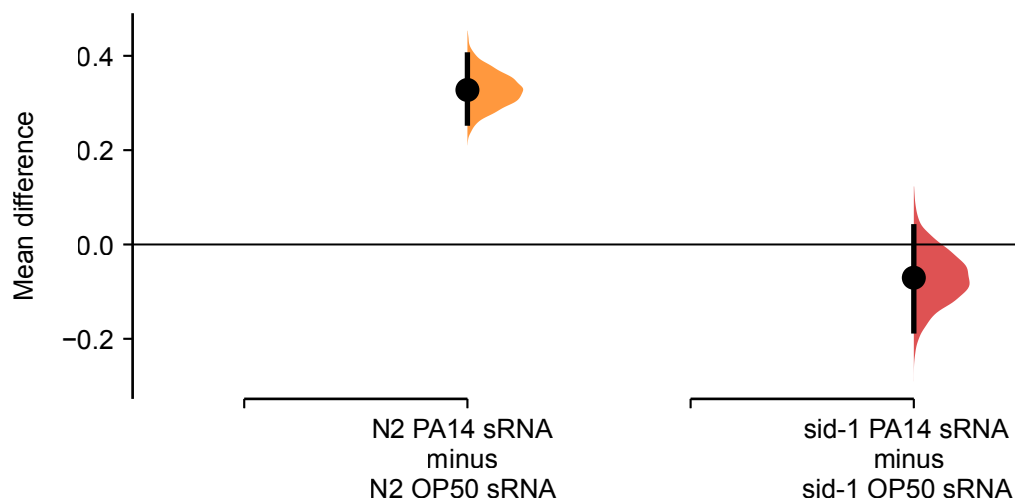

2E

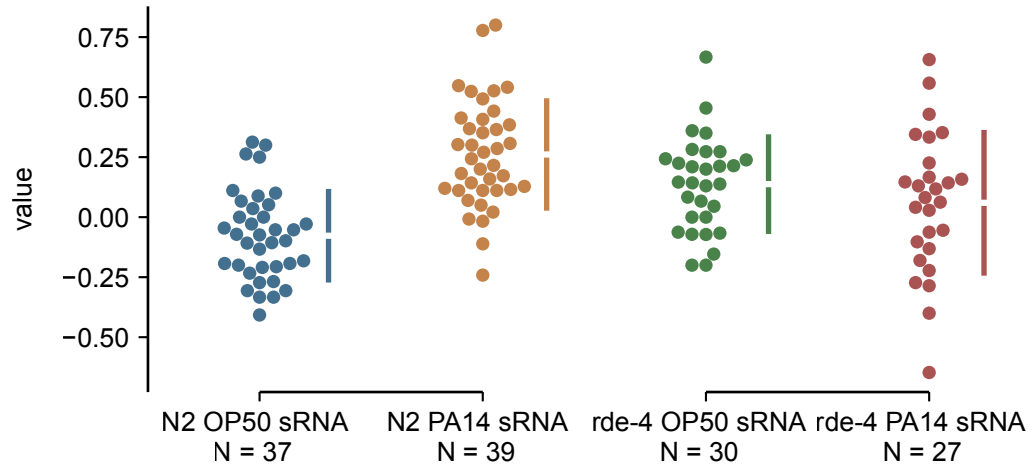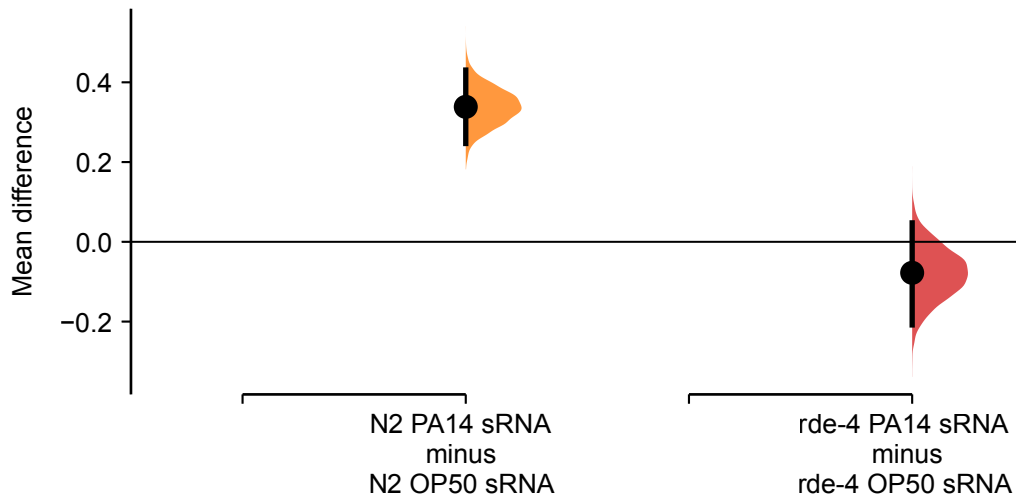

2F

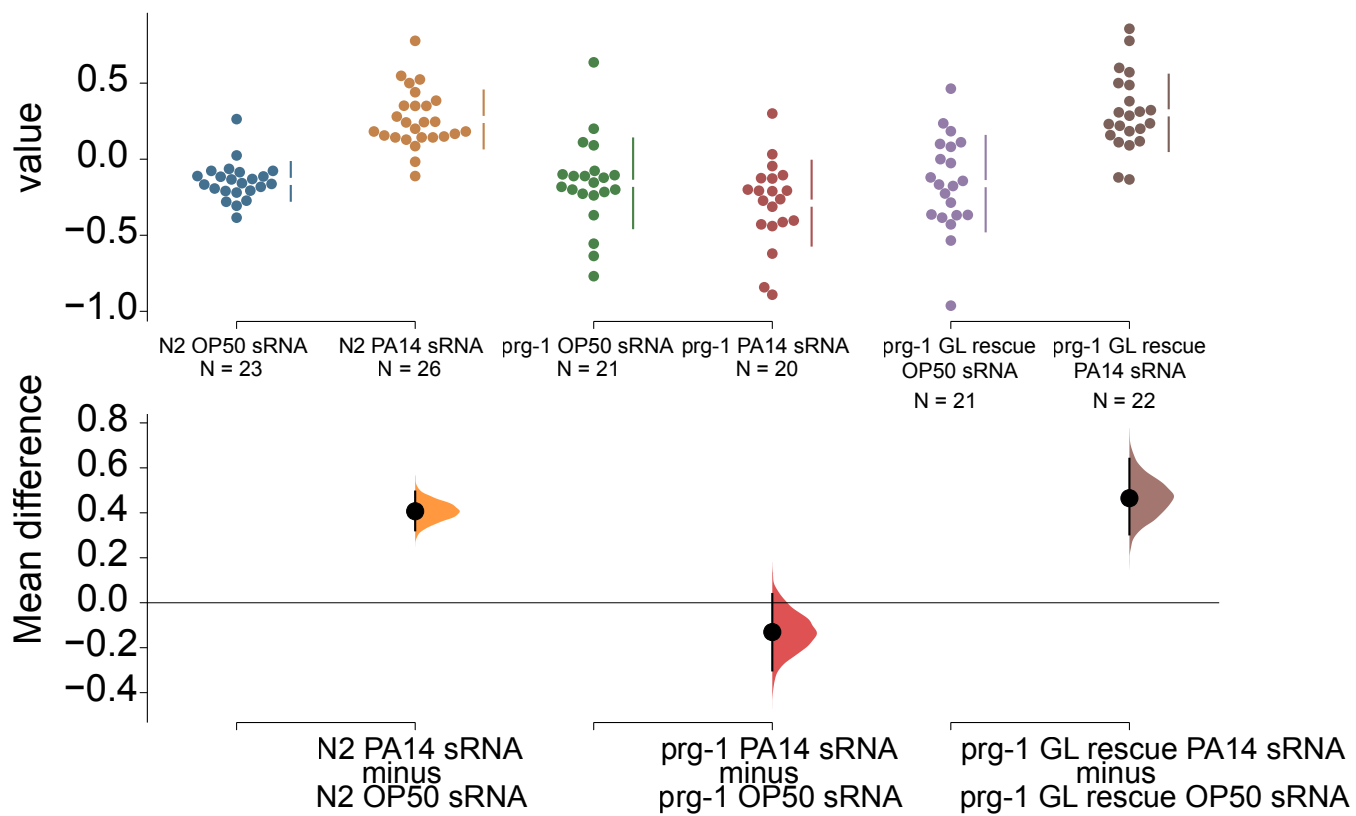

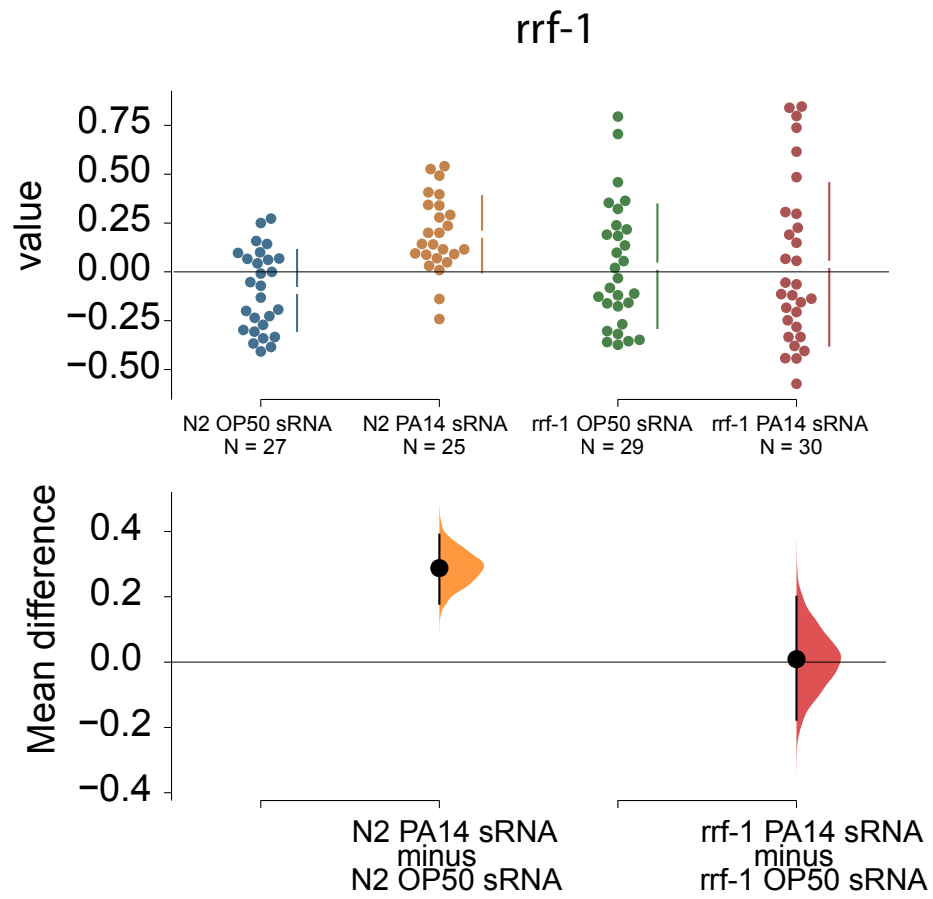

2H

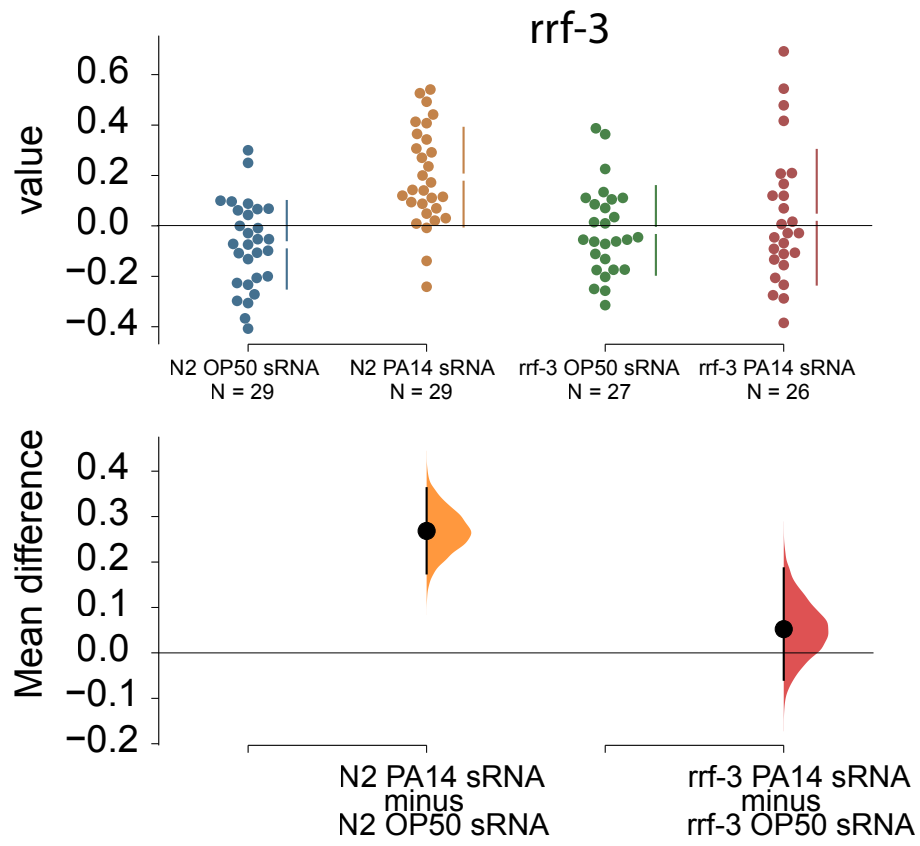

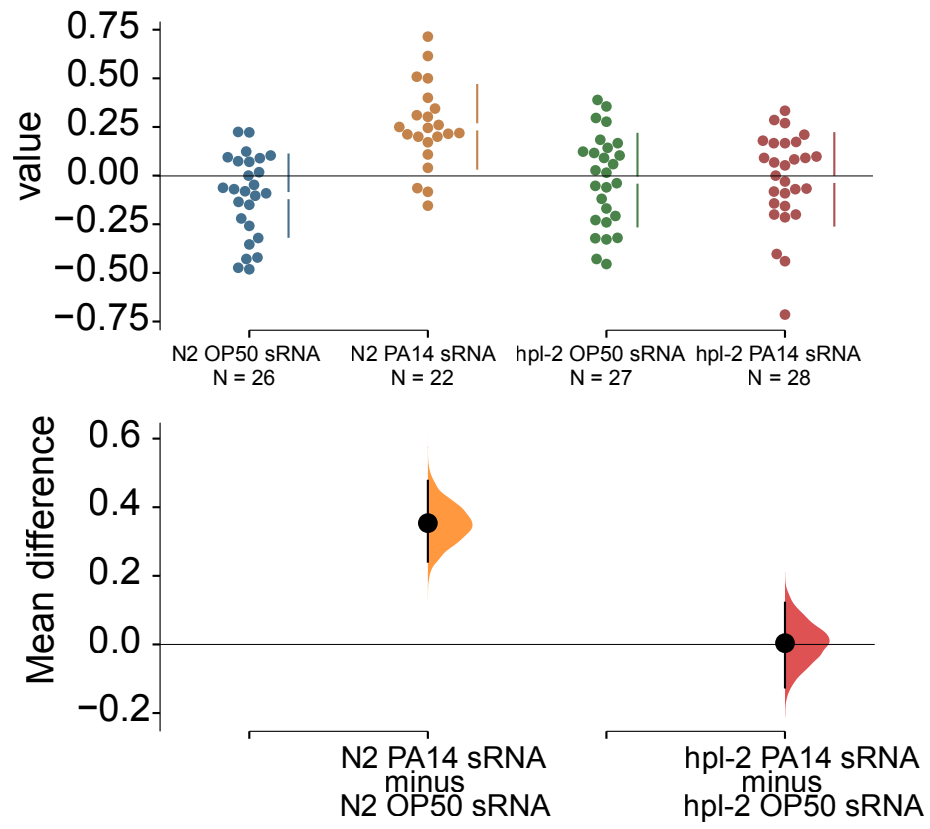

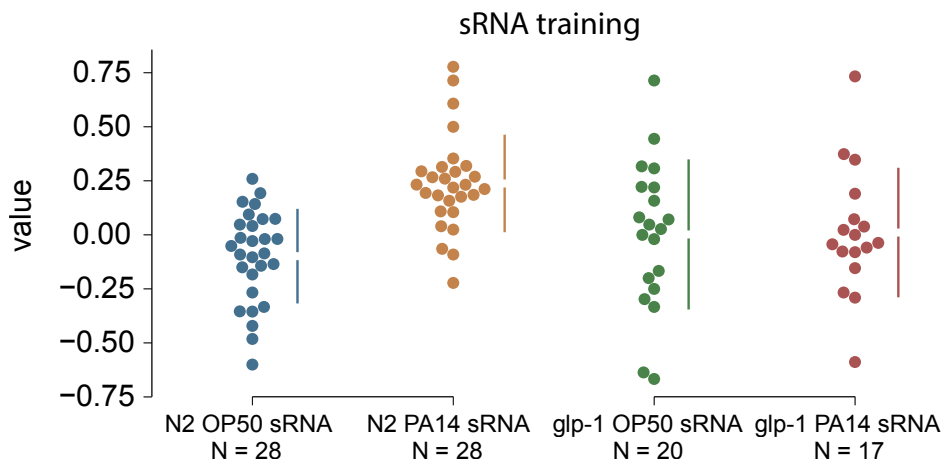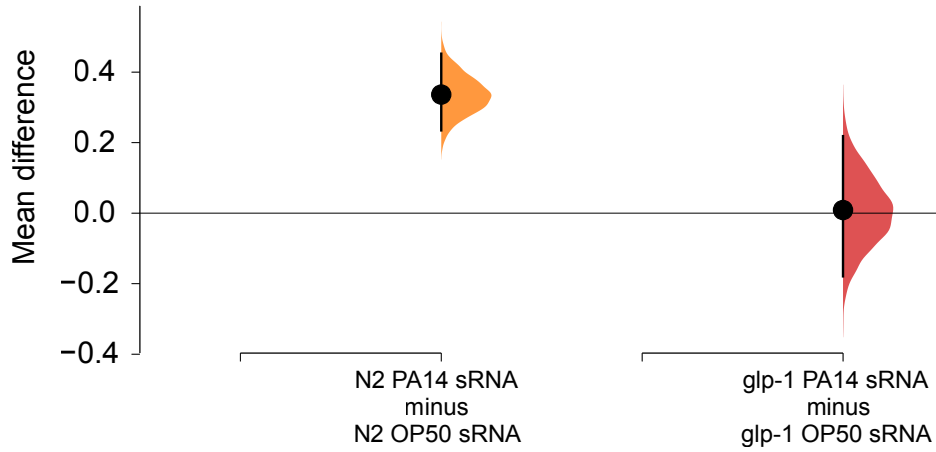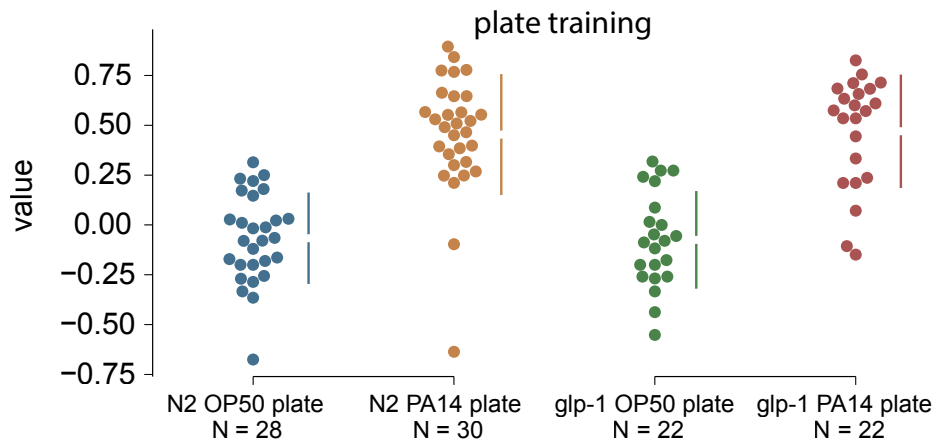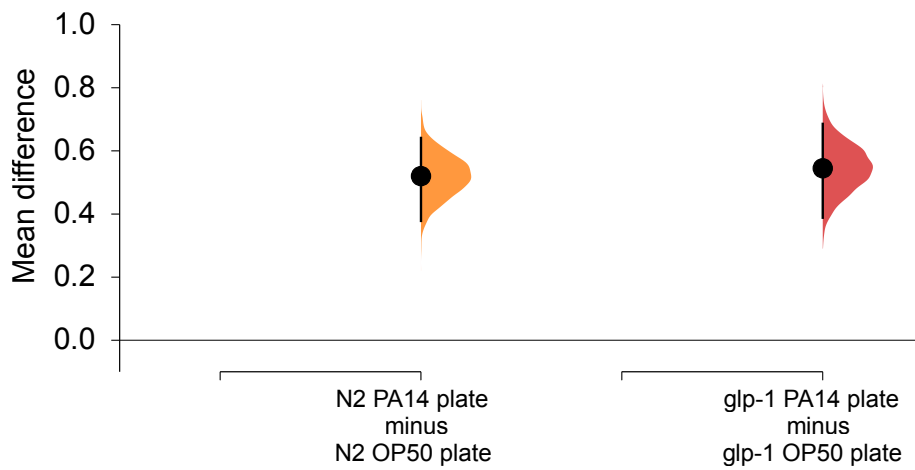



2M

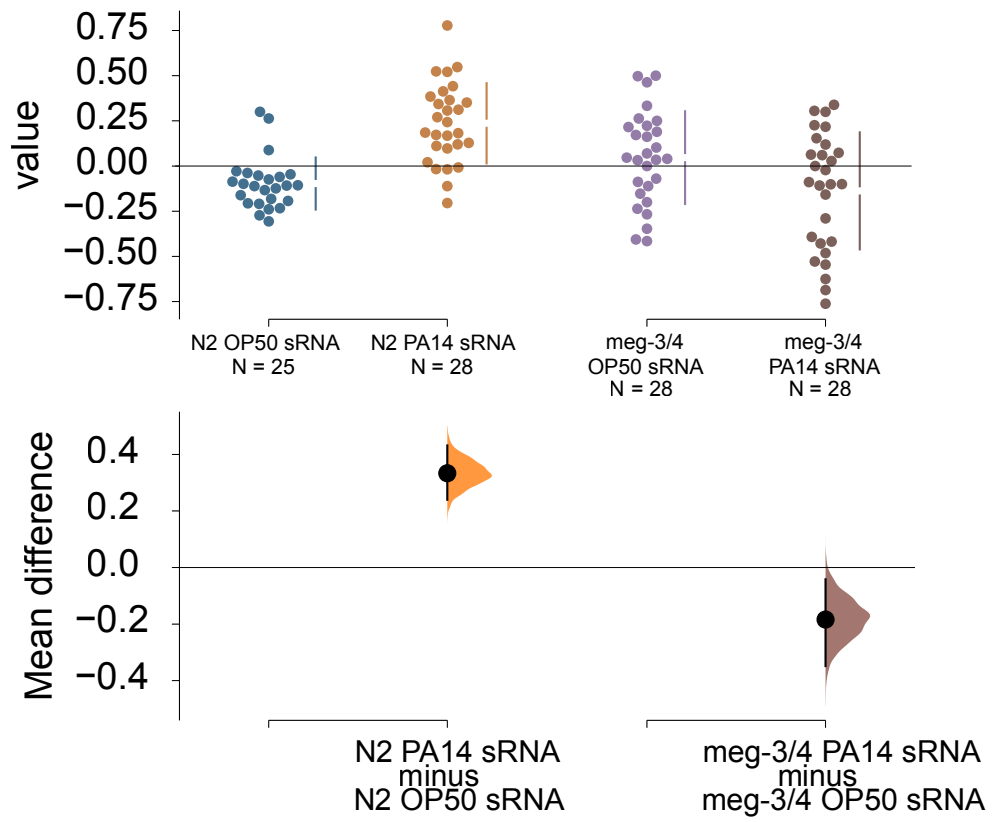

## OP50 vs PA14 plate

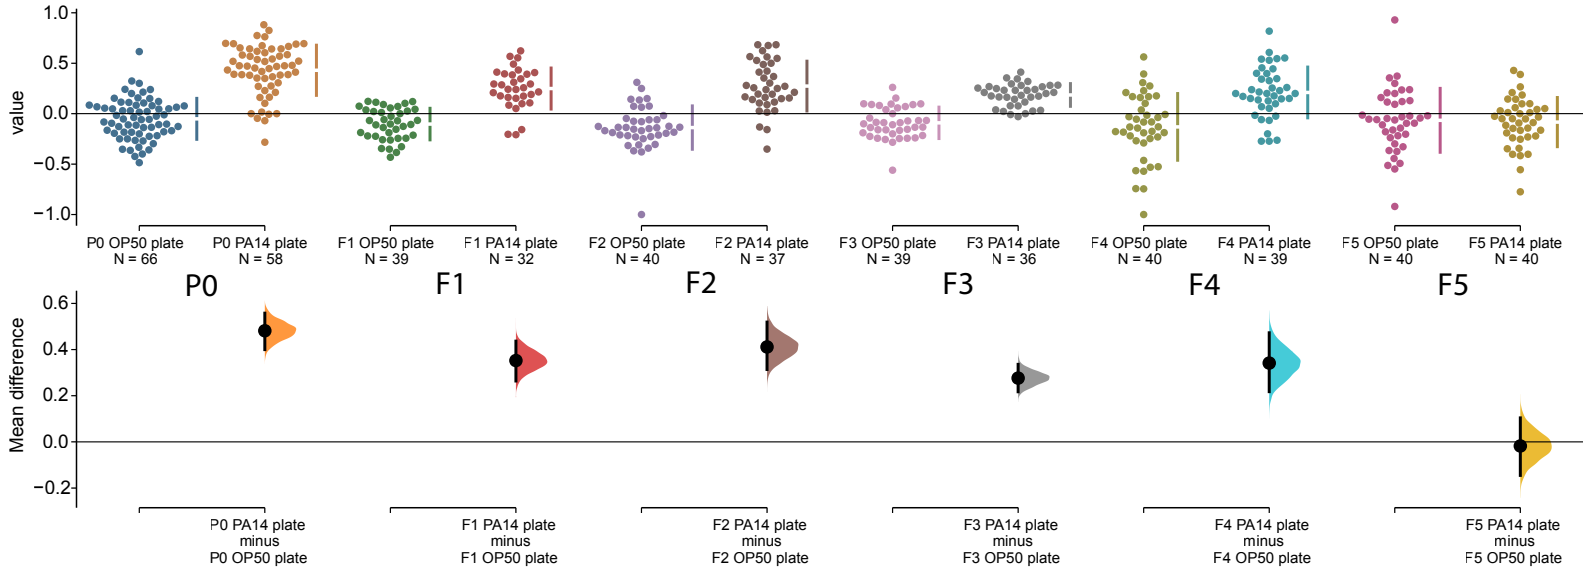

## OP50 vs PA14 sRNA

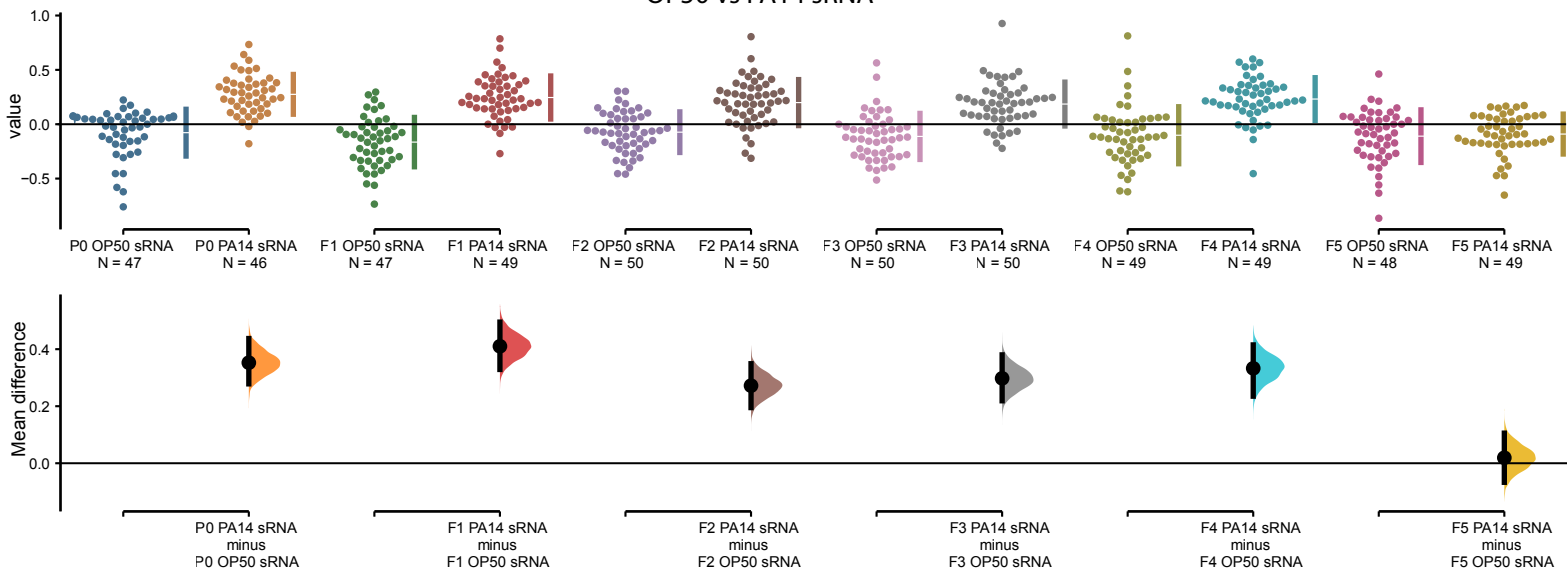



3A

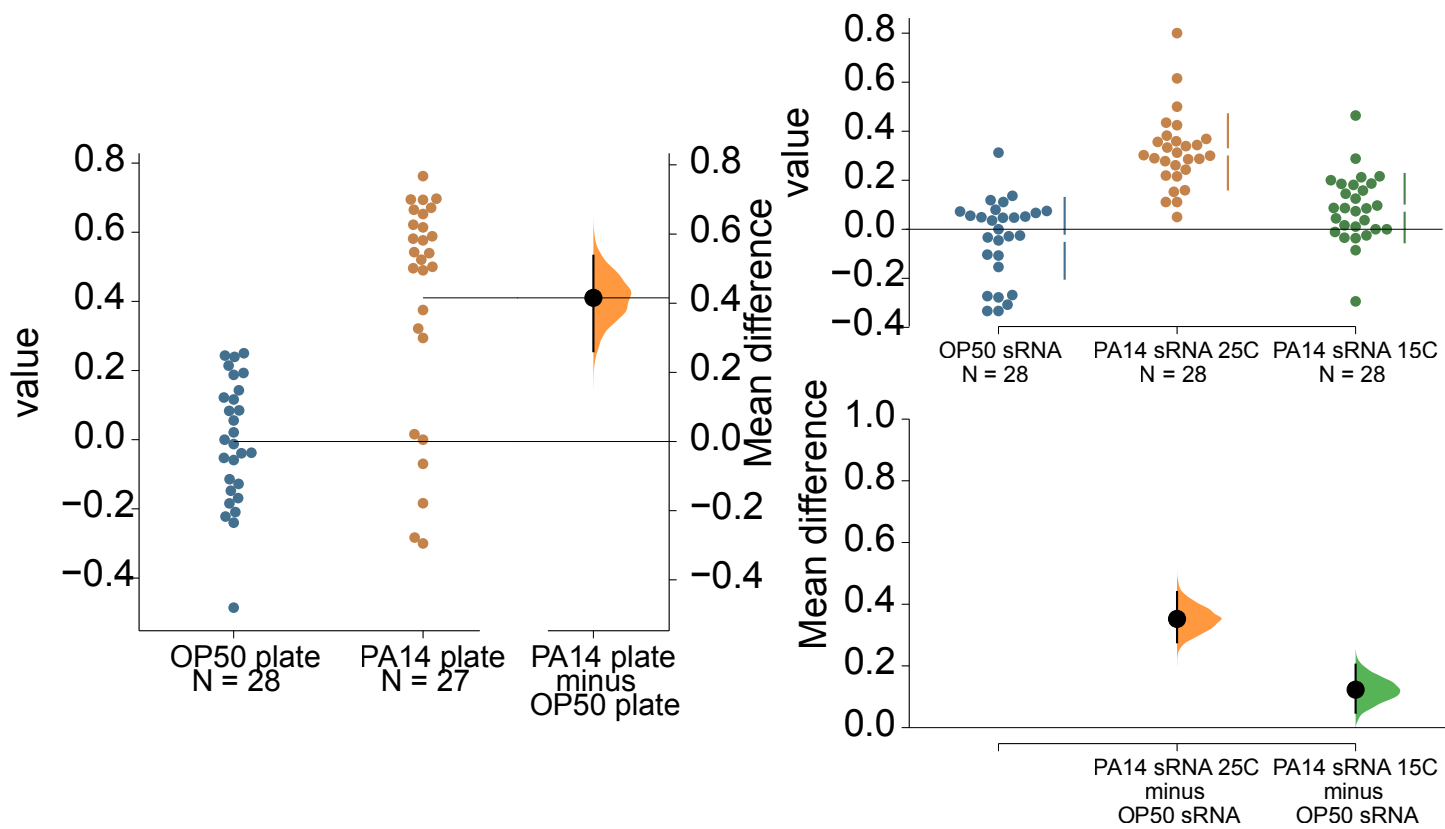

3B

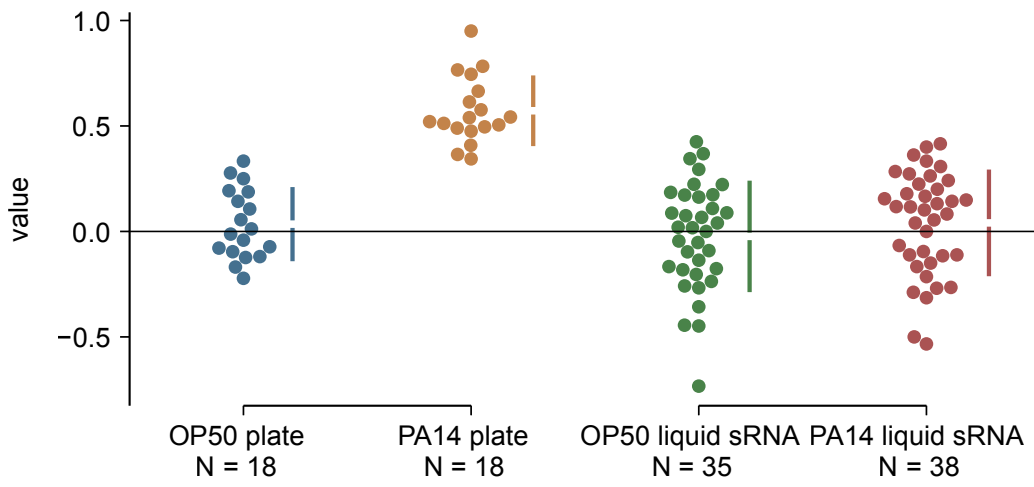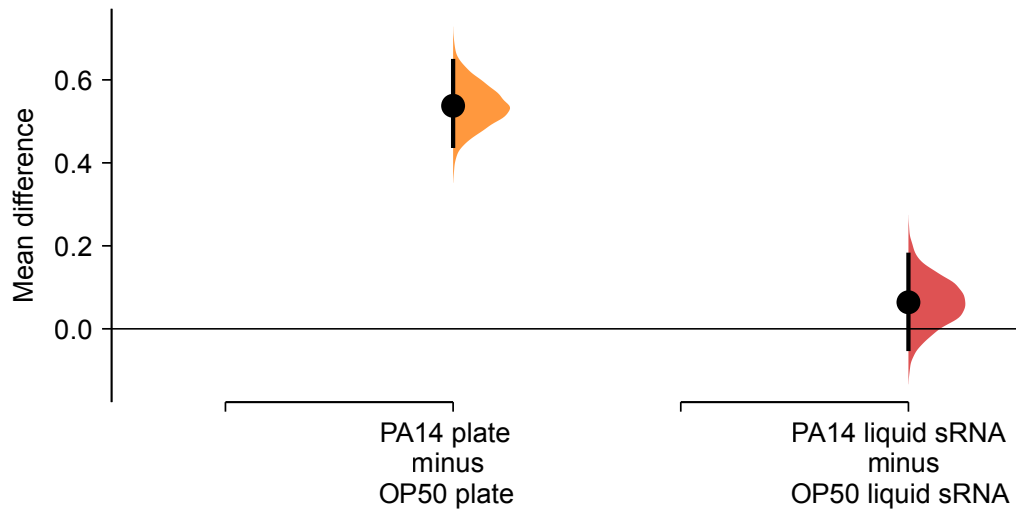

3C

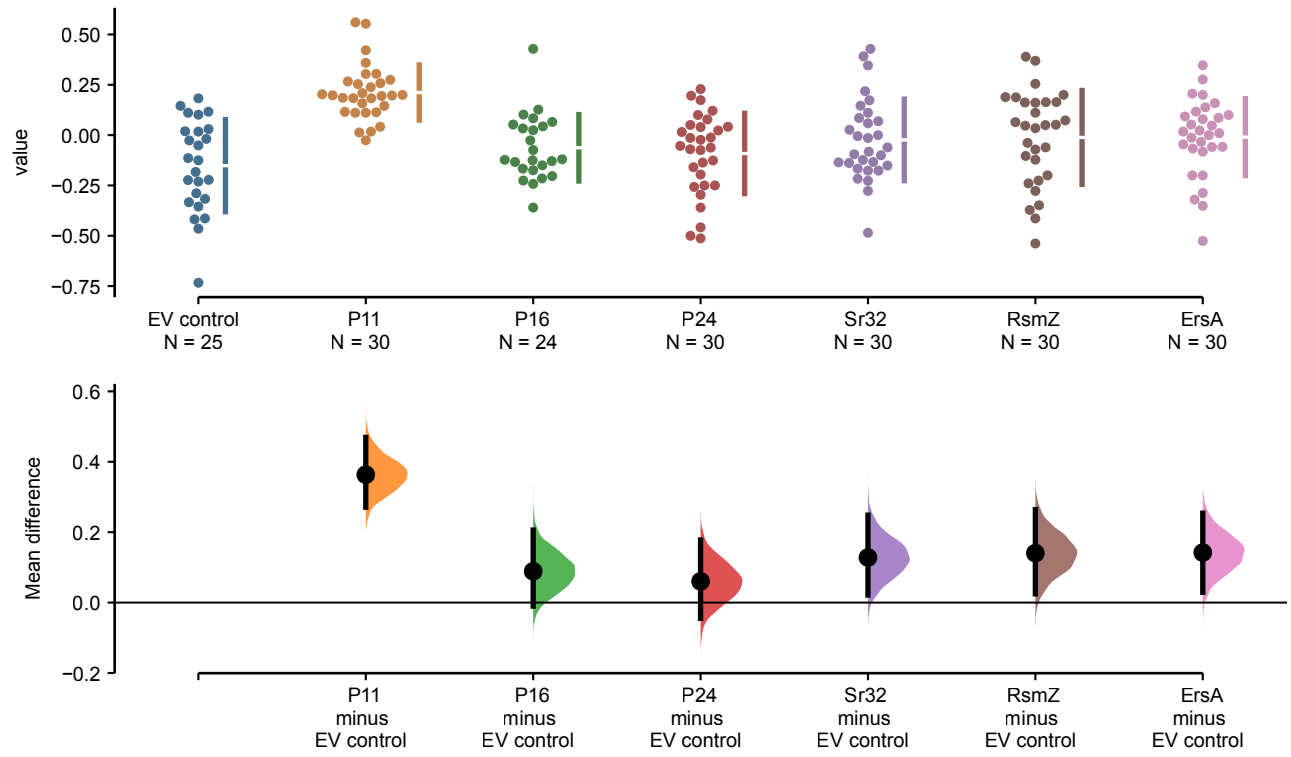

3F

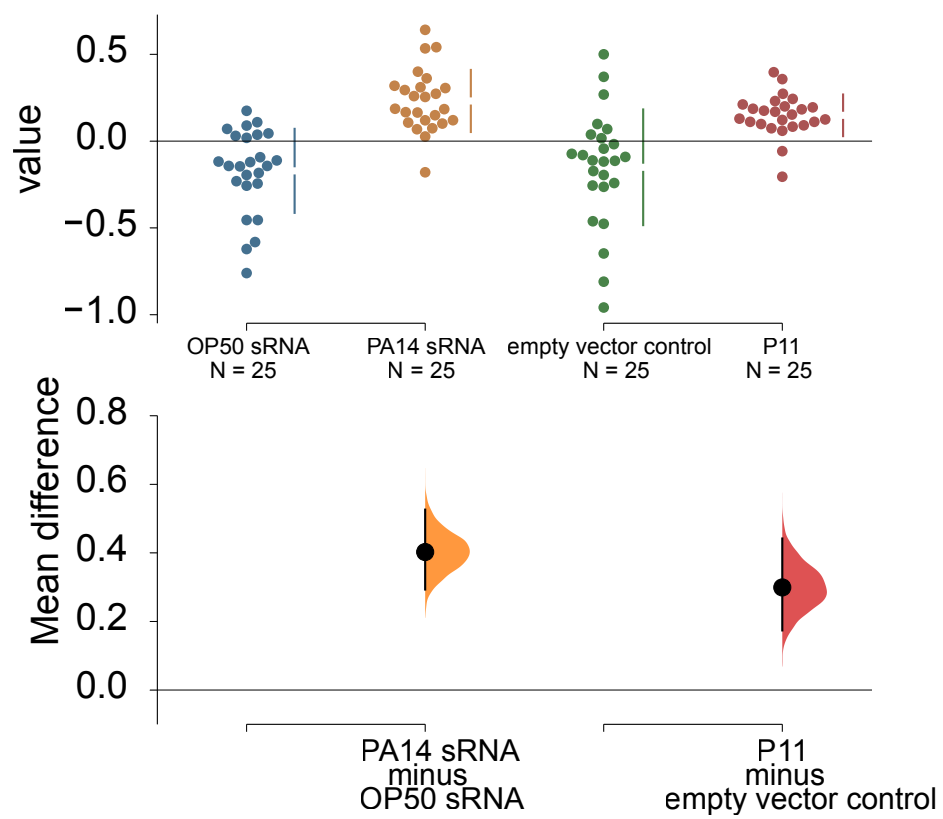

3H

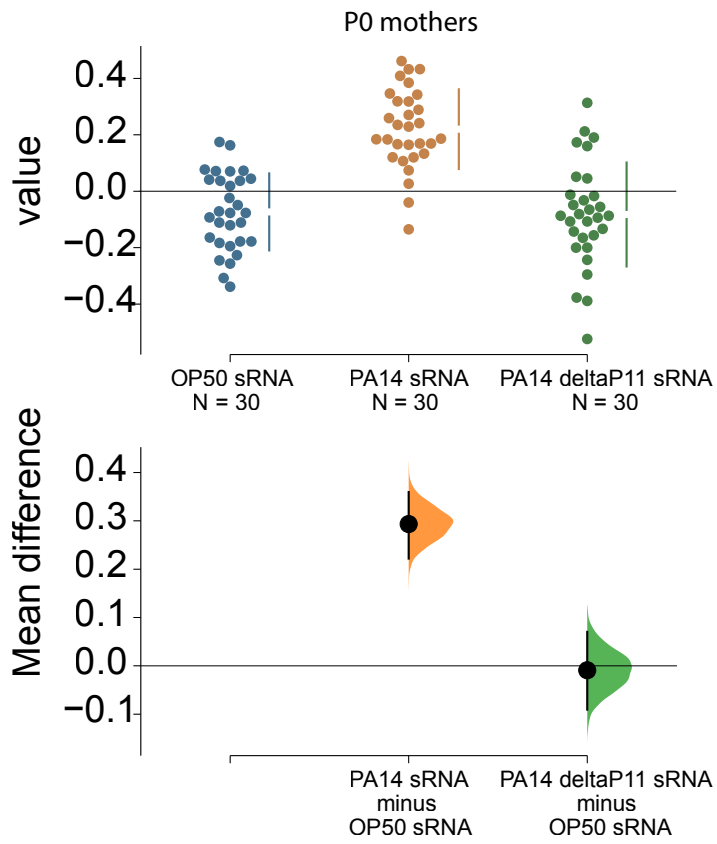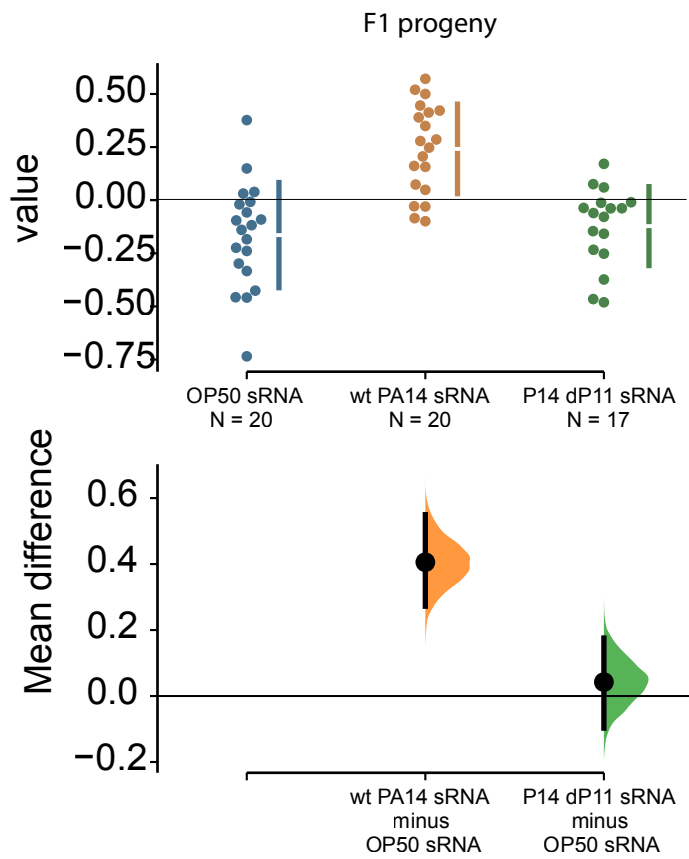



## control vs E. coli+P11 plate

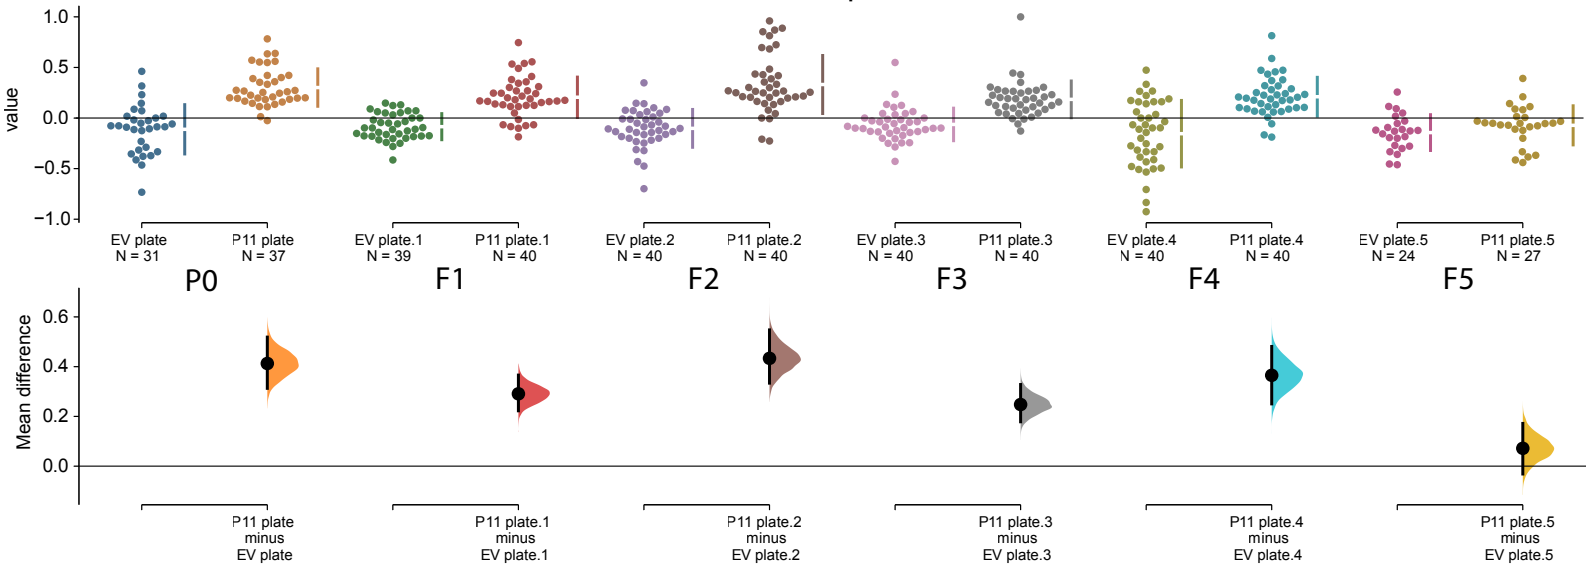

## control vs P11 sRNA

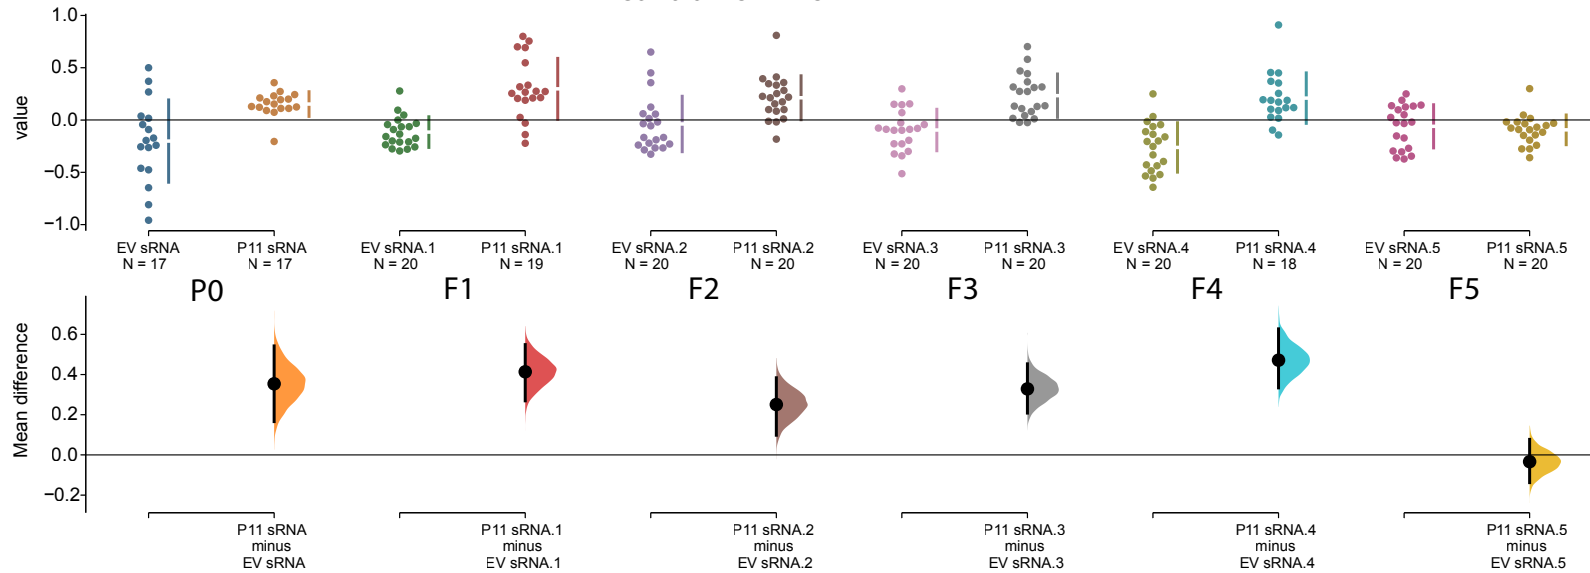

3L

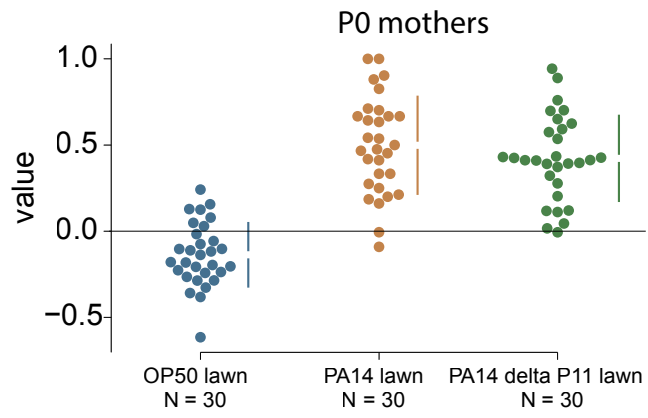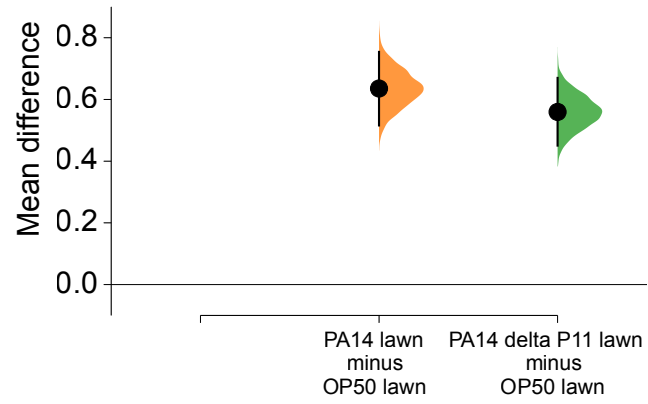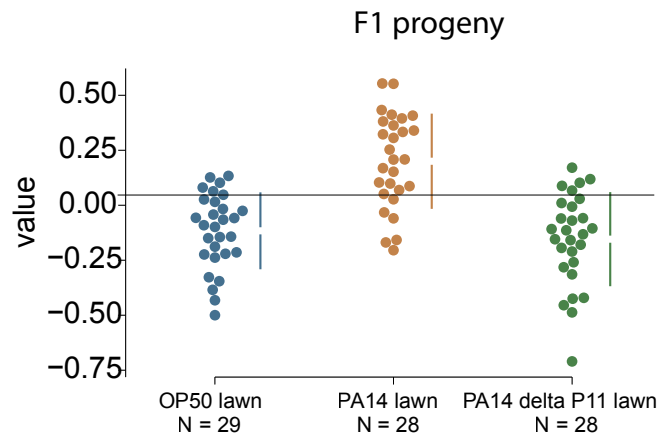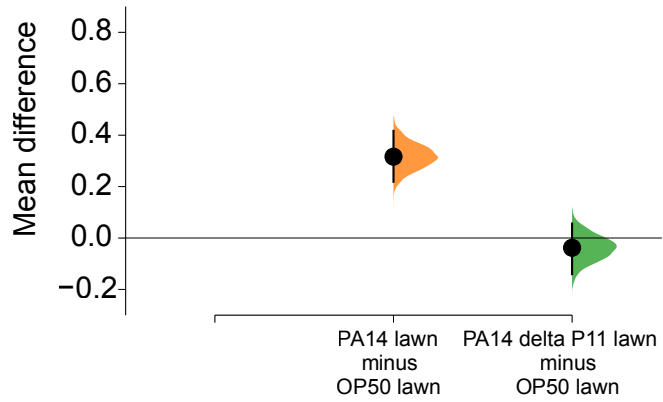

# 4C

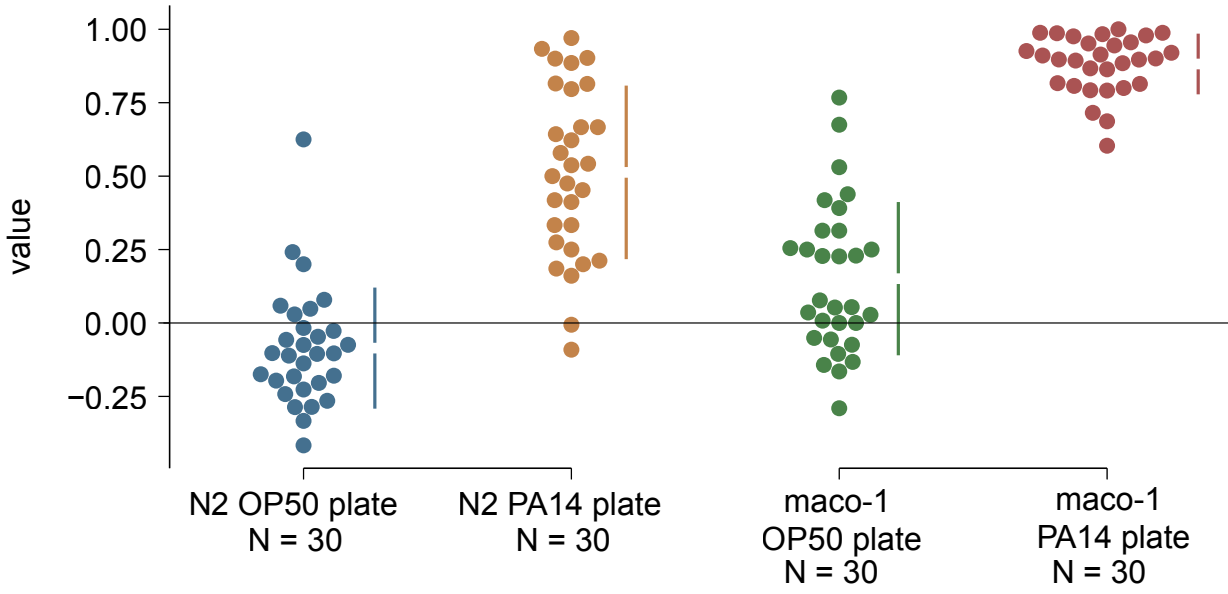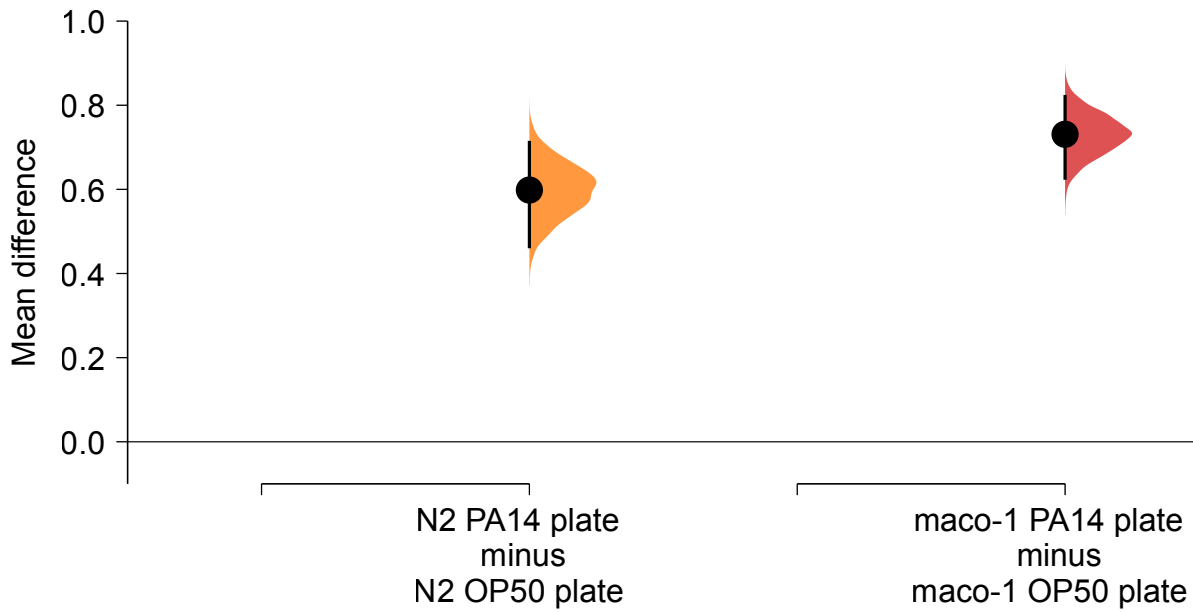

# 4C

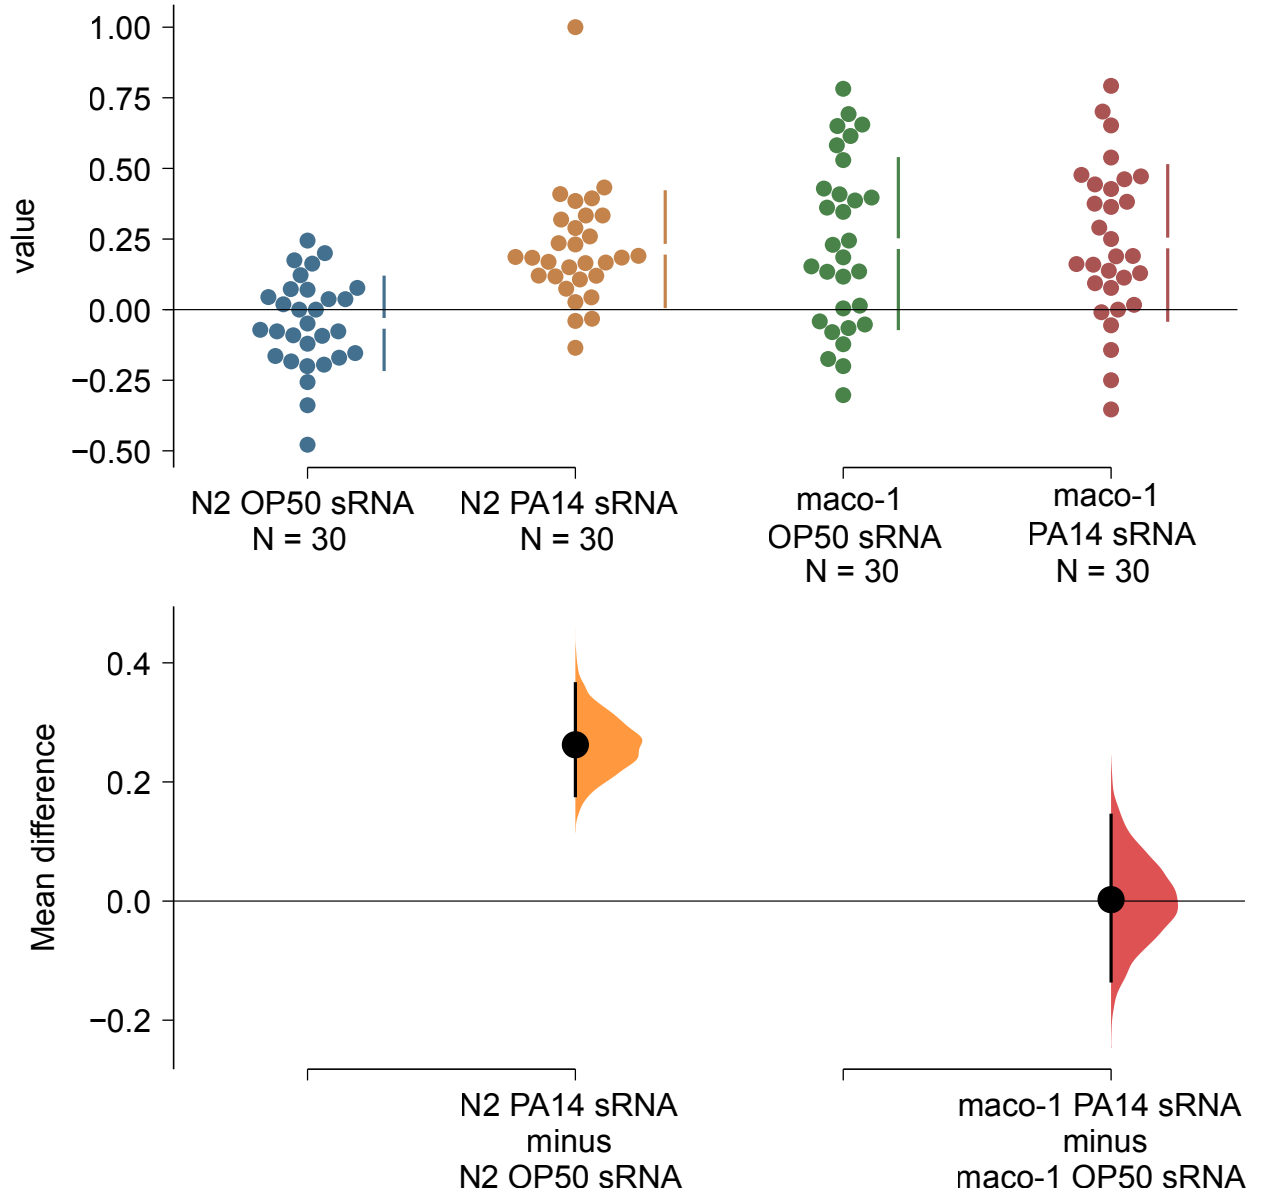

4E

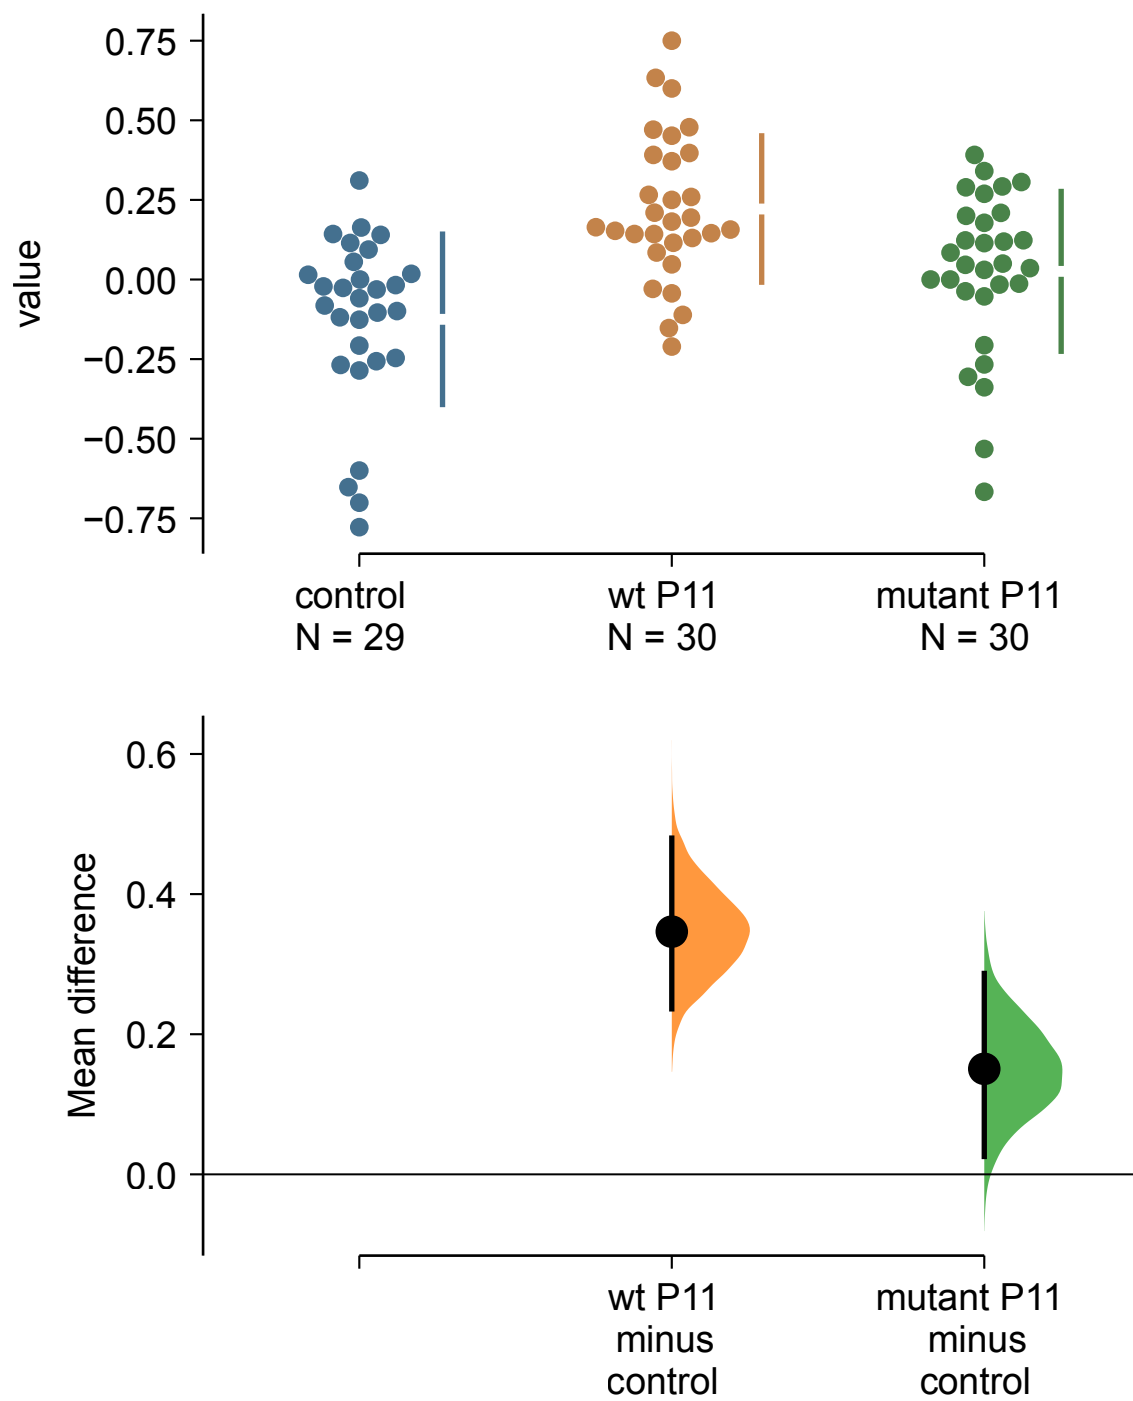

control vs *maco-1*(RNAi)-treated P0 mothers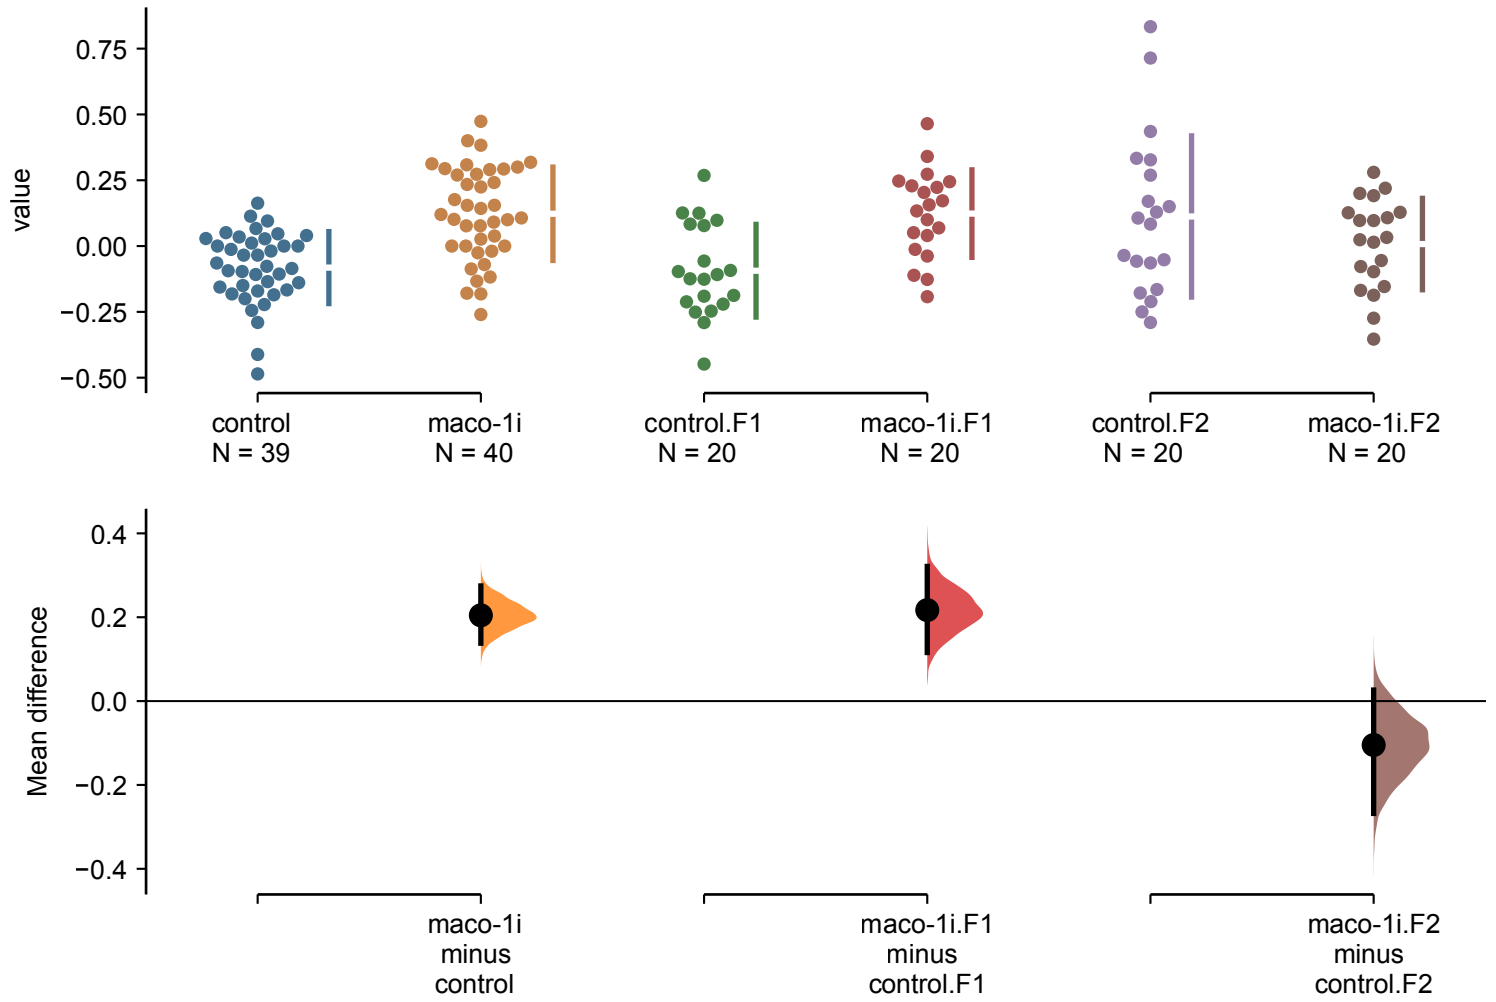

Supplement: NIHMS1604847-supplement-2.pdf [file NIHMS1604847-supplement-2.pdf]
